# Supplementary material for: Genetic diversity and phylogeographic structure of Bactrian camels shown by mitochondrial sequence variations
Source: PubMed Central journal article supplement — Anim Genet. 2016 Oct 24;48(2):217–20. doi: 10.1111/age.12511 (PMC5347888; doi:10.1111/age.12511), 2016-10-24
Supplement: AGE-48-217-s001.pdf [file AGE-48-217-s001.pdf]

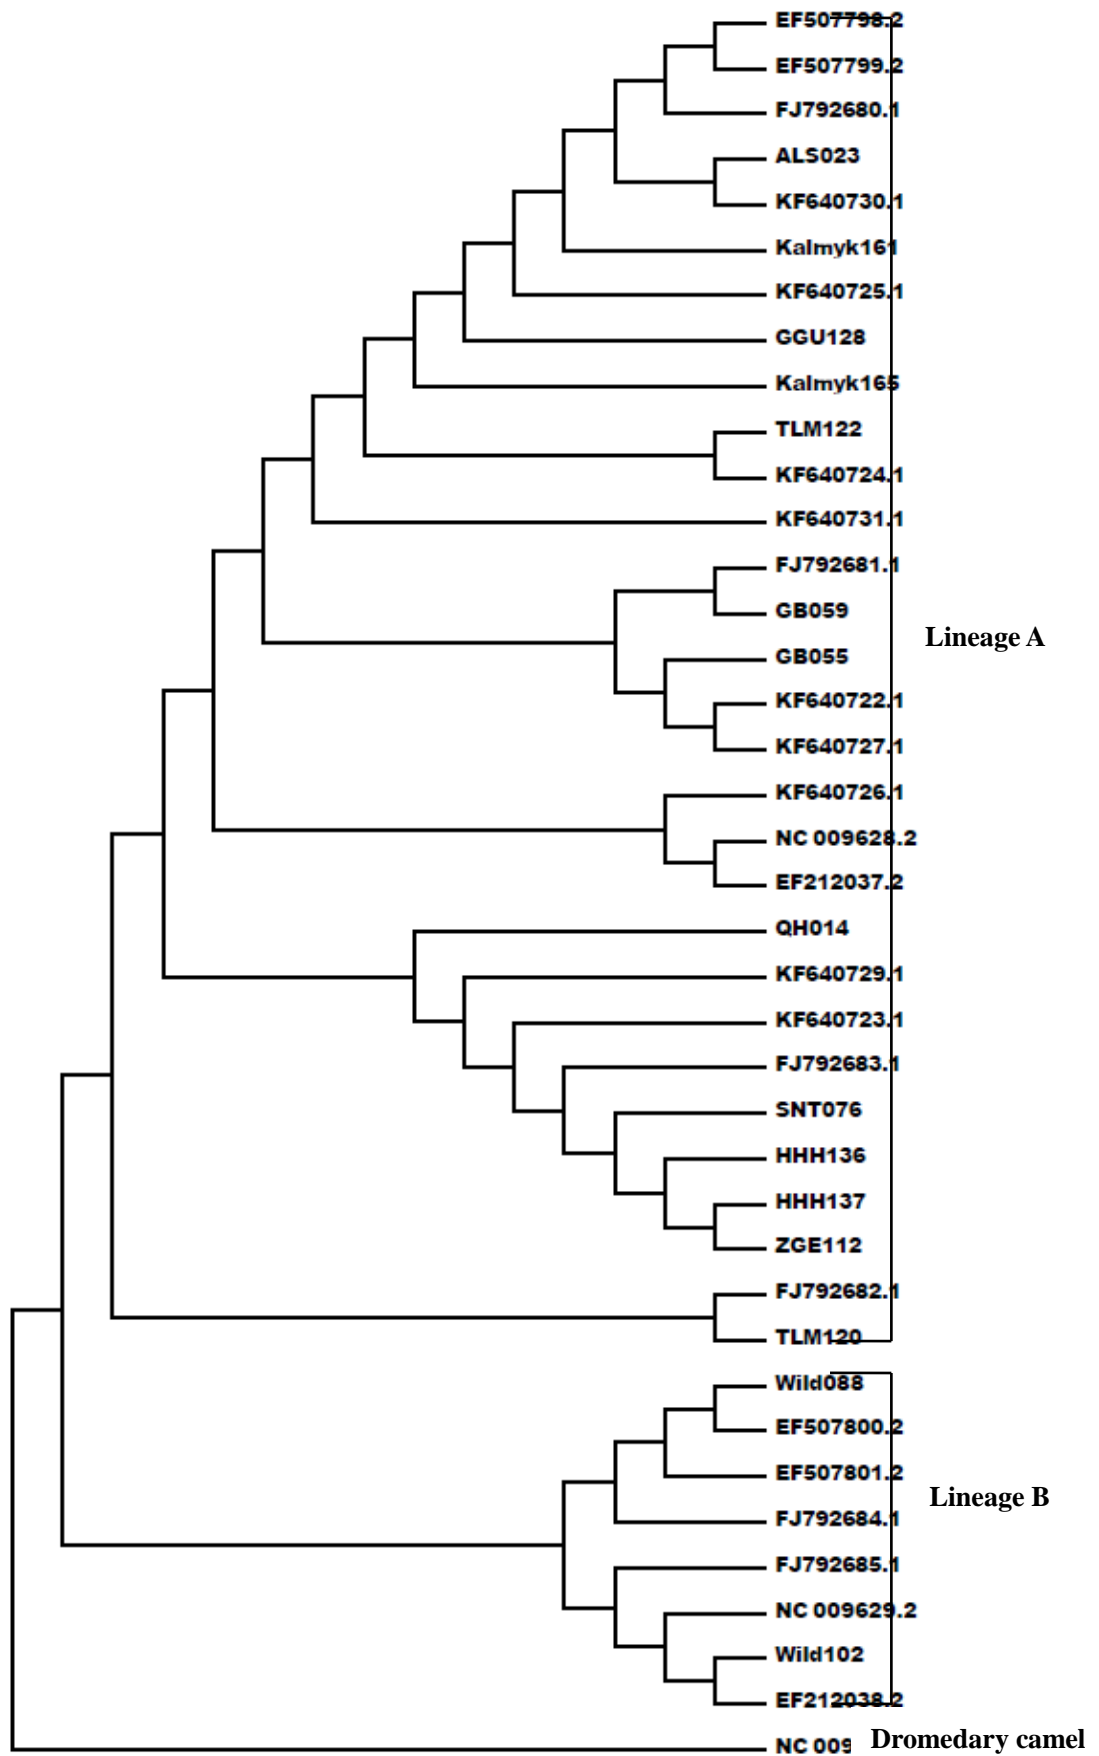

Figure S1 Neighbour-joining tree of wild and domestic Bactrian camel haplotypes based on 809 bp of the mtDNA. Haplotypes are grouped in two main lineages (lineage A and lineage B), each showing subgroupings.
