# Supplementary material for: Genetic diversity and phylogeographic structure of Bactrian camels shown by mitochondrial sequence variations
Source: PubMed Central journal article supplement — Anim Genet. 2016 Oct 24;48(2):217–20. doi: 10.1111/age.12511 (PMC5347888; doi:10.1111/age.12511), 2016-10-24
Supplement: AGE-48-217-s002.pdf [file AGE-48-217-s002.pdf]

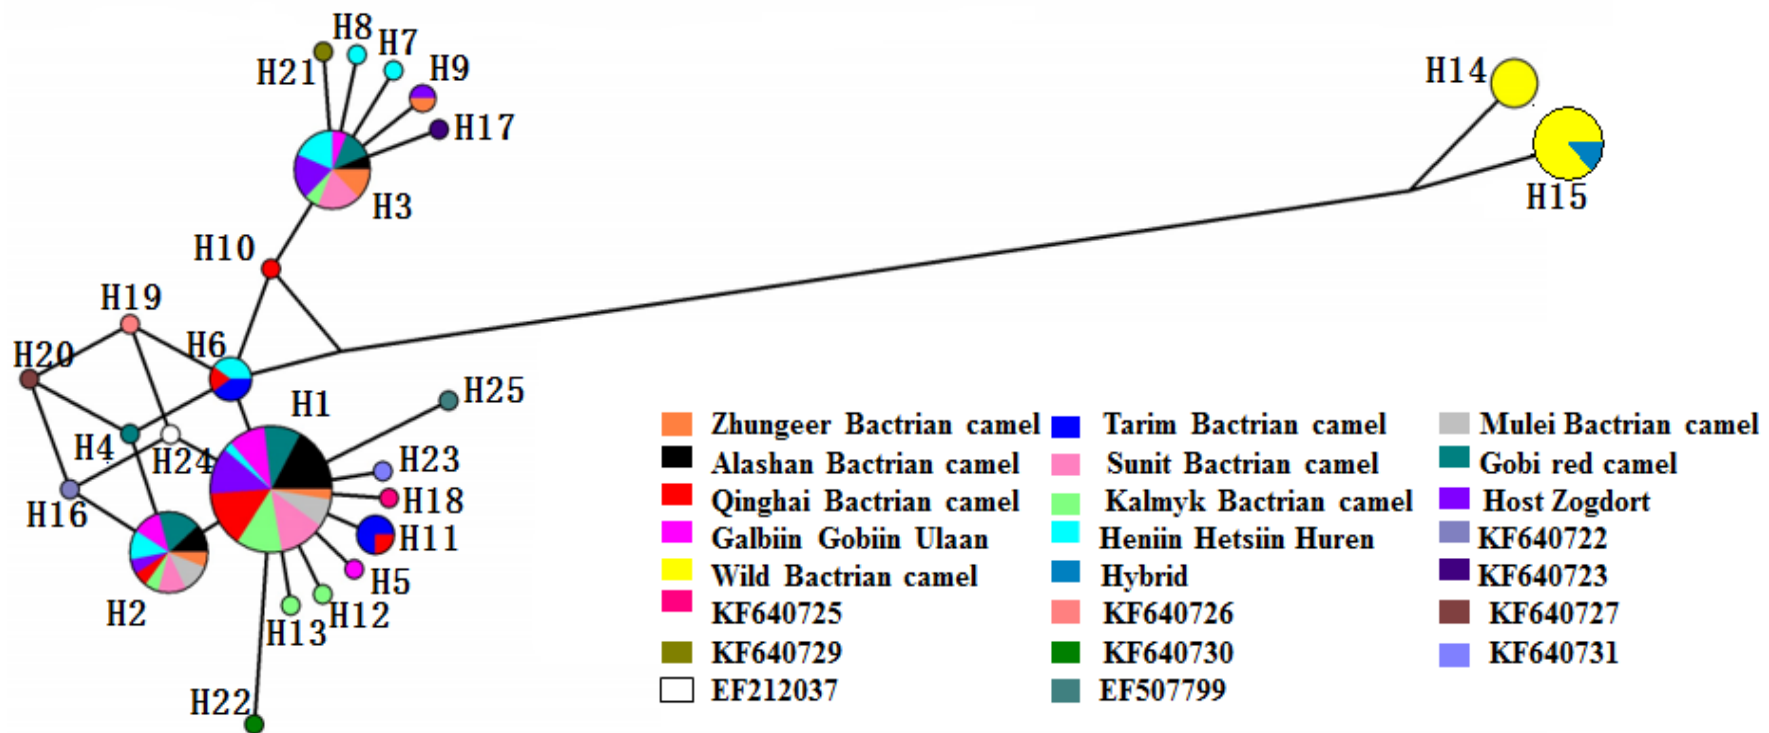

Figure S2 Median-joining network of 25 mtDNA haplotypes of domestic and wild Bactrian camels. The area of the circle is proportional to haplotype frequency.
