# Supplementary material for: Genetic diversity and phylogeographic structure of Bactrian camels shown by mitochondrial sequence variations
Source: PubMed Central journal article supplement — Anim Genet. 2016 Oct 24;48(2):217–20. doi: 10.1111/age.12511 (PMC5347888; doi:10.1111/age.12511), 2016-10-24
Supplement: AGE-48-217-s003.pdf [file AGE-48-217-s003.pdf]

Table S1 Details of the Bactrian camels used for analysis of mitochondrial (mtDNA) haplotypes

| Camel ID | Origin                            | Breed    | Sample type* | Mt haplotype** |
|----------|-----------------------------------|----------|--------------|----------------|
| QH007    | China, Qinghai                    | Qinghai  | B            | H1             |
| QH008    | China, Qinghai                    | Qinghai  | B            | H1             |
| QH011    | China, Qinghai                    | Qinghai  | B            | H1             |
| QH012    | China, Qinghai                    | Qinghai  | B            | H6             |
| QH014    | China, Qinghai                    | Qinghai  | B            | H10            |
| QH017    | China, Qinghai                    | Qinghai  | B            | H11            |
| QH018    | China, Qinghai                    | Qinghai  | B            | H2             |
| QH019    | China, Qinghai                    | Qinghai  | B            | H1             |
| QH020    | China, Qinghai                    | Qinghai  | B            | H1             |
| QH021    | China, Qinghai                    | Qinghai  | B            | H1             |
| ALS023   | China, Inner Mongolia, Alashan    | Alashan  | B            | H1             |
| ALS024   | China, Inner Mongolia, Alashan    | Alashan  | B            | H1             |
| ALS025   | China, Inner Mongolia, Alashan    | Alashan  | B            | H1             |
| ALS028   | China, Inner Mongolia, Alashan    | Alashan  | B            | H1             |
| ALS030   | China, Inner Mongolia, Alashan    | Alashan  | B            | H2             |
| ALS045   | China, Inner Mongolia, Alashan    | Alashan  | B            | H1             |
| ALS049   | China, Inner Mongolia, Alashan    | Alashan  | B            | H2             |
| ALS050   | China, Inner Mongolia, Alashan    | Alashan  | B            | H1             |
| ALS053   | China, Inner Mongolia, Alashan    | Alashan  | B            | H1             |
| ALS054   | China, Inner Mongolia, Alashan    | Alashan  | B            | H3             |
| GB055    | China, Inner Mongolia, Bayannaoer | Gobi Red | B            | H4             |
| GB056    | China, Inner Mongolia, Bayannaoer | Gobi Red | B            | H3             |
| GB057    | China, Inner Mongolia, Bayannaoer | Gobi Red | B            | H2             |
| GB059    | China, Inner Mongolia, Bayannaoer | Gobi Red | B            | H2             |
| GB060    | China, Inner Mongolia, Bayannaoer | Gobi Red | B            | H1             |
| GB062    | China, Inner Mongolia, Bayannaoer | Gobi Red | B            | H3             |
| GB064    | China, Inner Mongolia, Bayannaoer | Gobi Red | B            | H2             |
| GB065    | China, Inner Mongolia, Bayannaoer | Gobi Red | B            | H1             |
| GB066    | China, Inner Mongolia, Bayannaoer | Gobi Red | B            | H1             |
| GB069    | China, Inner Mongolia, Bayannaoer | Gobi Red | B            | H1             |
| SNT070   | China, Inner Mongolia, Sunite     | Sunit    | B            | H3             |
| SNT071   | China, Inner Mongolia, Sunite     | Sunit    | B            | H2             |
| SNT072   | China, Inner Mongolia, Sunite     | Sunit    | B            | H1             |
| SNT074   | China, Inner Mongolia, Sunite     | Sunit    | B            | H1             |
| SNT075   | China, Inner Mongolia, Sunite     | Sunit    | B            | H2             |
| SNT076   | China, Inner Mongolia, Sunite     | Sunit    | B            | H3             |
| SNT078   | China, Inner Mongolia, Sunite     | Sunit    | B            | H3             |
| SNT083   | China, Inner Mongolia, Sunite     | Sunit    | B            | H1             |
| SNT084   | China, Inner Mongolia, Sunite     | Sunit    | B            | H1             |
| SNT085   | China, Inner Mongolia, Sunite     | Sunit    | B            | H1             |

---

|           |                             |          |   |     |
|-----------|-----------------------------|----------|---|-----|
| Wild088   | Mongolia, Gobi Altai        | Wild     | E | H14 |
| Wild089   | Mongolia, Gobi Altai        | Wild     | E | H14 |
| Wild090   | Mongolia, Gobi Altai        | Wild     | E | H14 |
| Wild091   | Mongolia, Gobi Altai        | Wild     | E | H14 |
| Wild092   | Mongolia, Gobi Altai        | Wild     | E | H14 |
| Wild093   | Mongolia, Gobi Altai        | Wild     | E | H15 |
| Wild094   | Mongolia, Gobi Altai        | Wild     | E | H14 |
| Wild095   | Mongolia, Gobi Altai        | Wild     | E | H14 |
| Wild096   | Mongolia, Gobi Altai        | Wild     | E | H15 |
| Wild097   | Mongolia, Gobi Altai        | Wild     | E | H14 |
| Wild098   | Mongolia, Gobi Altai        | Wild     | E | H14 |
| Wild099   | Mongolia, Gobi Altai        | Wild     | E | H15 |
| Wild100   | Mongolia, Gobi Altai        | Wild     | E | H14 |
| Wild101   | Mongolia, Gobi Altai        | Wild     | E | H14 |
| Wild102   | Mongolia, Gobi Altai        | Wild     | E | H15 |
| Wild103   | Mongolia, Gobi Altai        | Wild     | E | H15 |
| Wild104   | Mongolia, Gobi Altai        | Wild     | E | H14 |
| Wild105   | Mongolia, Gobi Altai        | Wild     | E | H15 |
| Wild106   | Mongolia, Gobi Altai        | Wild     | E | H14 |
| Hybrid107 | Mongolia, Gobi Altai        | Hybrid   | E | H14 |
| Hybrid108 | Mongolia, Gobi Altai        | Hybrid   | E | H14 |
| ZGE110    | China, Xinjiang, Zhungeer   | Zhungeer | B | H3  |
| ZGE111    | China, Xinjiang, Zhungeer   | Zhungeer | B | H1  |
| ZGE112    | China, Xinjiang, Zhungeer   | Zhungeer | B | H9  |
| ZGE113    | China, Xinjiang, Zhungeer   | Zhungeer | B | H2  |
| ZGE114    | China, Xinjiang, Zhungeer   | Zhungeer | B | H3  |
| ML115     | China, Xinjiang, Mulei      | Mulei    | B | H1  |
| ML116     | China, Xinjiang, Mulei      | Mulei    | B | H2  |
| ML117     | China, Xinjiang, Mulei      | Mulei    | B | H2  |
| ML118     | China, Xinjiang, Mulei      | Mulei    | B | H1  |
| ML119     | China, Xinjiang, Mulei      | Mulei    | B | H1  |
| TLM120    | China, Xinjiang, Talimu     | Tarim    | B | H6  |
| TLM121    | China, Xinjiang, Talimu     | Tarim    | B | H11 |
| TLM122    | China, Xinjiang, Talimu     | Tarim    | B | H11 |
| TLM123    | China, Xinjiang, Talimu     | Tarim    | B | H6  |
| TLM124    | China, Xinjiang, Talimu     | Tarim    | B | H11 |
| GGU125    | Mongolia, Umnugobi, Hanbogd | GGU      | B | H2  |
| GGU126    | Mongolia, Umnugobi, Hanbogd | GGU      | B | H1  |
| GGU127    | Mongolia, Umnugobi, Hanbogd | GGU      | B | H3  |
| GGU128    | Mongolia, Umnugobi, Hanbogd | GGU      | B | H5  |
| GGU130    | Mongolia, Umnugobi, Hanbogd | GGU      | B | H1  |
| GGU131    | Mongolia, Umnugobi, Hanbogd | GGU      | B | H1  |
| GGU132    | Mongolia, Umnugobi, Hanbogd | GGU      | B | H1  |
| GGU133    | Mongolia, Umnugobi, Hanbogd | GGU      | B | H2  |

---

|                        |                                 |        |    |     |
|------------------------|---------------------------------|--------|----|-----|
| HHH135                 | Mongolia, Umnugobi, Mandal-ovoo | HHH    | B  | H6  |
| HHH136                 | Mongolia, Umnugobi, Mandal-ovoo | HHH    | B  | H7  |
| HHH137                 | Mongolia, Umnugobi, Mandal-ovoo | HHH    | B  | H8  |
| HHH138                 | Mongolia, Umnugobi, Mandal-ovoo | HHH    | B  | H6  |
| HHH139                 | Mongolia, Umnugobi, Mandal-ovoo | HHH    | B  | H3  |
| HHH140                 | Mongolia, Umnugobi, Mandal-ovoo | HHH    | B  | H1  |
| HHH141                 | Mongolia, Umnugobi, Mandal-ovoo | HHH    | B  | H2  |
| HHH142                 | Mongolia, Umnugobi, Mandal-ovoo | HHH    | B  | H3  |
| HHH143                 | Mongolia, Umnugobi, Mandal-ovoo | HHH    | B  | H2  |
| HHH144                 | Mongolia, Umnugobi, Mandal-ovoo | HHH    | B  | H3  |
| HZ145                  | Mongolia, Gobi Altai, Tugrug    | HZ     | B  | H1  |
| HZ146                  | Mongolia, Gobi Altai, Tugrug    | HZ     | B  | H1  |
| HZ147                  | Mongolia, Gobi Altai, Tugrug    | HZ     | B  | H9  |
| HZ148                  | Mongolia, Gobi Altai, Tugrug    | HZ     | B  | H2  |
| HZ149                  | Mongolia, Gobi Altai, Tugrug    | HZ     | B  | H3  |
| HZ150                  | Mongolia, Gobi Altai, Tugrug    | HZ     | B  | H3  |
| HZ151                  | Mongolia, Gobi Altai, Tugrug    | HZ     | B  | H1  |
| HZ152                  | Mongolia, Gobi Altai, Tugrug    | HZ     | B  | H3  |
| HZ153                  | Mongolia, Gobi Altai, Tugrug    | HZ     | B  | H1  |
| HZ154                  | Mongolia, Gobi Altai, Tugrug    | HZ     | B  | H1  |
| Kalmyk158              | Russia, Astrakhan               | Kalmyk | B  | H1  |
| Kalmyk159              | Russia, Astrakhan               | Kalmyk | B  | H1  |
| Kalmyk160              | Russia, Astrakhan               | Kalmyk | B  | H2  |
| Kalmyk161              | Russia, Astrakhan               | Kalmyk | B  | H12 |
| Kalmyk162              | Russia, Astrakhan               | Kalmyk | B  | H1  |
| Kalmyk163              | Russia, Astrakhan               | Kalmyk | B  | H3  |
| Kalmyk165              | Russia, Astrakhan               | Kalmyk | B  | H13 |
| Kalmyk166              | Russia, Astrakhan               | Kalmyk | B  | H1  |
| Kalmyk167              | Russia, Astrakhan               | Kalmyk | B  | H1  |
| FJ792680 <sup>1</sup>  | Silbermayr et al,               | NA     | NA | H1  |
| EF507798 <sup>1</sup>  | GenBank                         | NA     | NA | H1  |
| FJ792681 <sup>1</sup>  | Silbermayr et al, 2009          | NA     | NA | H2  |
| FJ792683 <sup>1</sup>  | Silbermayr et al, 2009          | NA     | NA | H3  |
| FJ792682 <sup>1</sup>  | Silbermayr et al, 2009          | NA     | NA | H6  |
| EF507801 <sup>1</sup>  | GenBank                         | Wild   | NA | H14 |
| EF507800 <sup>1</sup>  | GenBank                         | Wild   | NA | H14 |
| FJ792684 <sup>1</sup>  | Silbermayr et al, 2009          | Wild   | NA | H14 |
| NC_009629 <sup>1</sup> | GenBank,                        | Wild   | NA | H15 |
| FJ792685 <sup>1</sup>  | Silbermayr et al, 2009          | Wild   | NA | H15 |
| EF212038 <sup>1</sup>  | GenBank                         | Wild   | NA | H15 |

\* B: blood; E: ear.

\*\* H1-H13: domestic Bactrian camel haplotypes, H14 and H15: wild Bactrian camel haplotypes.

GGU: Galbiin Gobiin Ulaan; HZ: Hos Zogdort; HHH: Haniin Hetsiin Huren.

<sup>1</sup>: previously described haplotypes
