# Supplementary material for: Genetic diversity and phylogeographic structure of Bactrian camels shown by mitochondrial sequence variations
Source: PubMed Central journal article supplement — Anim Genet. 2016 Oct 24;48(2):217–20. doi: 10.1111/age.12511 (PMC5347888; doi:10.1111/age.12511), 2016-10-24
Supplement: AGE-48-217-s004.pdf [file AGE-48-217-s004.pdf]

|          |     |   |   |   |   |   |   |   |   |   |   |   |   |   |   |   |   |   |   |   |   |   |   |   |   |   |   |   |   |   |   |   |   |   |   |   |   |   |   |   |   |   |   |   |   |   |   |   |   |
|----------|-----|---|---|---|---|---|---|---|---|---|---|---|---|---|---|---|---|---|---|---|---|---|---|---|---|---|---|---|---|---|---|---|---|---|---|---|---|---|---|---|---|---|---|---|---|---|---|---|---|
| KF640723 | H17 | G | T | . | . | . | . | . | . | . | . | . | . | . | . | . | . | . | T | . | . | . | C | . | . | . | . | . | . | . | . | . | . | . | . | . | . | . | . | - |   |   |   |   |   |   |   |   |   |
| KF640725 | H18 | . | . | . | . | . | . | . | . | . | . | . | . | . | . | . | . | . | . | . | . | . | . | . | . | . | . | . | . | . | . | . | . | . | . | . | . | . | . | . | - |   |   |   |   |   |   |   |   |
| KF640726 | H19 | . | . | . | . | . | . | . | . | . | . | . | . | . | . | . | . | . | . | T | . | . | . | C | . | . | . | . | . | . | . | . | . | . | . | . | . | . | . | . | - |   |   |   |   |   |   |   |   |
| KF640727 | H20 | . | . | . | . | . | . | . | . | . | . | . | . | . | . | . | . | . | G | T | . | . | . | C | . | . | . | . | . | . | . | . | . | . | . | . | . | . | . | . | - |   |   |   |   |   |   |   |   |
| KF640729 | H21 | G | T | . | . | . | . | . | . | . | . | . | . | . | . | . | . | . | . | . | . | . | . | . | . | . | . | . | . | . | . | . | . | . | . | . | . | . | . | . | - |   |   |   |   |   |   |   |   |
| KF640730 | H22 | . | . | . | . | . | . | . | . | . | . | . | . | . | . | . | . | . | . | . | . | . | . | . | . | . | . | . | . | . | . | . | . | . | . | . | . | C | T | . | - |   |   |   |   |   |   |   |   |
| KF640731 | H23 | . | . | . | A | . | . | . | . | . | . | . | . | . | . | . | . | . | . | . | . | . | . | . | . | . | . | . | . | . | . | . | . | . | . | . | . | . | . | . | - |   |   |   |   |   |   |   |   |
| EF212037 | H24 | . | . | . | . | . | . | . | . | . | . | . | . | . | . | . | . | . | . | . | . | . | . | . | . | . | . | . | . | . | . | . | . | . | . | . | . | . | . | . | - |   |   |   |   |   |   |   |   |
| EF507799 | H25 | . | . | . | . | . | . | . | . | . | . | . | . | . | . | . | . | . | . | . | . | . | . | . | . | . | . | . | . | . | . | . | . | . | . | . | . | T | A | . | T | . | . | . | . | . | . | . | - |

Sequences KF640722, KF640723, KF640725-KF640727 and KF640729-KF640731 were from Chuluunbat *et al.* (2014). Sequences EF212037 and EF507799 were obtained from GenBank.
